# Supplementary material for: Autoimmune Disease Classification by Inverse Association with SNP Alleles
Source: PubMed Central journal article supplement (PMC2791168; doi:10.1371/journal.pgen.1000792), 2009-12-24

N = 573

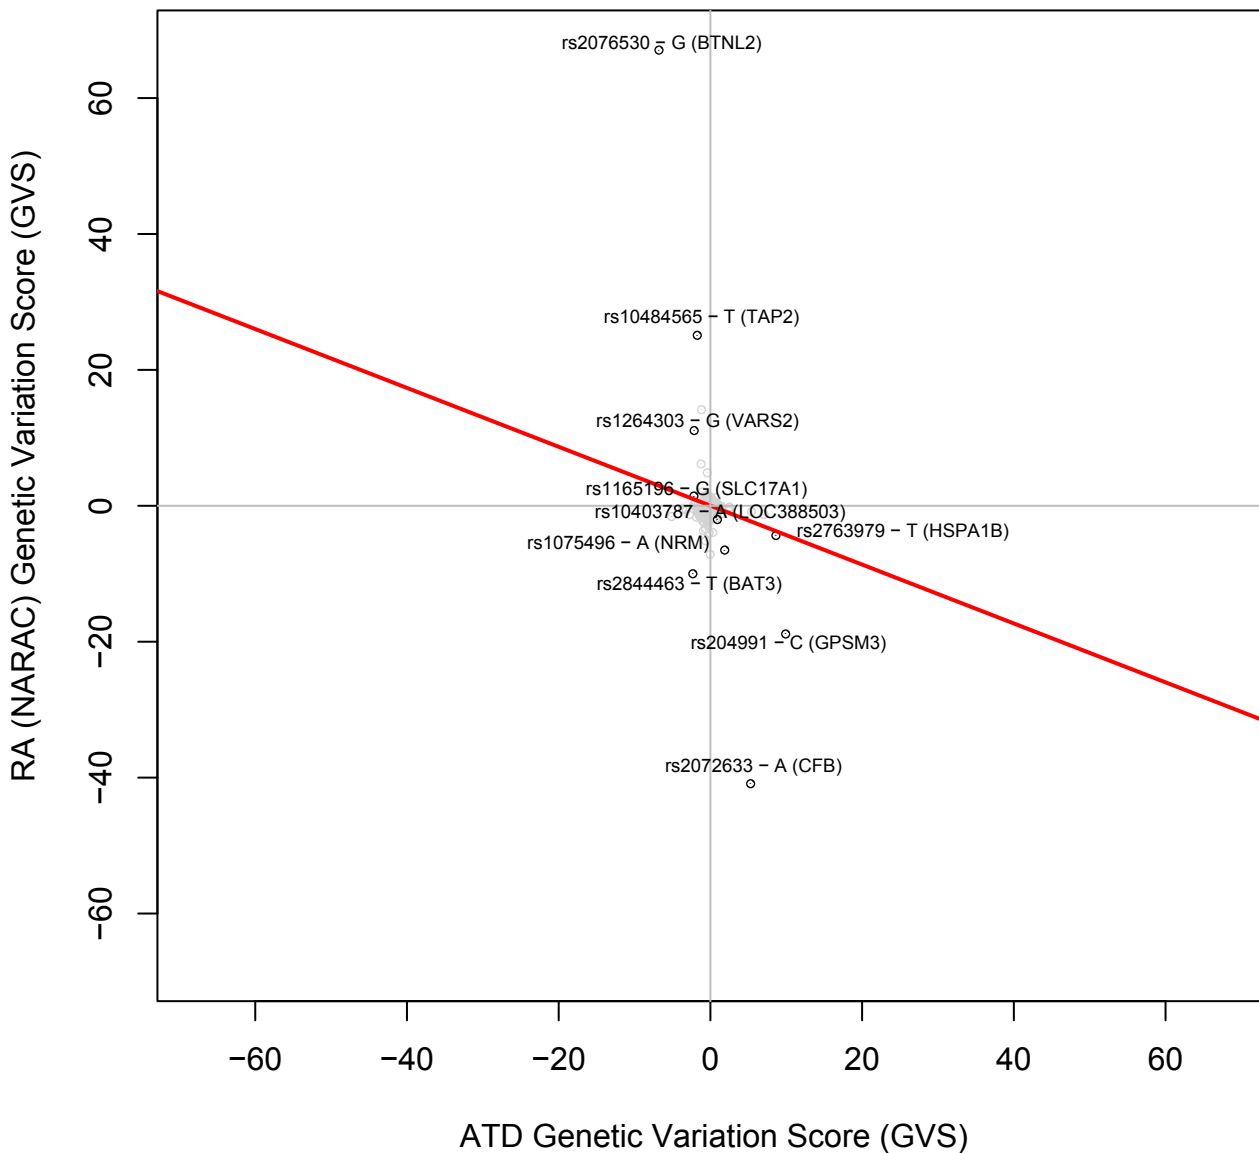

Supplement: pgen.1000792.s002.pdf [file pgen.1000792.s002.pdf]
